# Supplementary material
Source: PubMed Central journal article supplement (PMC1815277)
Supplement: pnas_0608046104_7.pdf [file pnas_0608046104_7.pdf]

**Table 1. Sequence identity in percent for the individual genes located on the photosynthesis operon of KT71 with the BAC clones EBAC65D09, EBAC29C02, and EBAC69B03**

| Gene                     | E.C.       | Match                                                                                        | % identity    |           |           |
|--------------------------|------------|----------------------------------------------------------------------------------------------|---------------|-----------|-----------|
|                          |            |                                                                                              | EBAC29C02     | EBAC65D09 | EBAC69B03 |
| BLUF                     | --         | BLUF (Sensor of blue-light using FAD) domain protein                                         | 46            | --        | --        |
| AcsF                     | 1.14.13.81 | Magnesium-protoporphyrin IX monomethyl ester aerobic oxidative cyclase                       | 63            | --        | --        |
| orf KT71_19333           | --         | Membrane protein                                                                             | no similarity | --        | --        |
| bchP                     | --         | Geranylgeranyl hydrogenase, bacteriochlorophyll biosynthesis                                 | 58            | 62        | 62        |
| pucC-like orf KT71_19343 | --         | Transcription regulator, membrane protein                                                    | 51            | 54        | 63        |
| bchG                     | 2.5.1.62   | Geranylgeranyl bacteriochlorophyll synthase, bacteriochlorophyll biosynthesis                | 63            | 58        | 65        |
| CrtJ                     | --         | Transcription regulator                                                                      | 42            | 42        | 42        |
| bchF                     | 4.2.1.-    | 2-Vinyl bacteriochlorophyll hydratase, bacteriochlorophyll biosynthesis                      | 51            | 61        | 70        |
| bchN                     | 1.18.-     | light-independent protochlorophyllide reductase, N subunit, bacteriochlorophyll biosynthesis | 61            | 63        | 63        |
| bchB                     | 1.18.-     | light-independent protochlorophyllide reductase, B subunit, bacteriochlorophyll biosynthesis | 69            | 66        | 66        |
| BchH                     | 6.6.1.1    | Magnesium-chelatase subunit H, bacteriochlorophyll biosynthesis                              | 56            | 58        | 59        |
| bchL                     | 1.18.-     | light-independent protochlorophyllide reductase, L subunit, bacteriochlorophyll biosynthesis | 74            | 75        | 83        |
| bchM                     | 2.1.1.11   | Mg-protoporphyrin IX methyl transferase, bacteriochlorophyll biosynthesis                    | 60            | 54        | 58        |
| pucC-like orf KT71_19388 | --         | Transcription regulator, membrane protein                                                    | 49            | 53        | 60        |
| PuhA                     | --         | reaction center protein H chain                                                              | 53            | 55        | 55        |
| orf KT71_19398           | --         | hypothetical 23.7 kDa protein in puhA 5'region                                               | 39            | 45        | --        |
| orf KT71_19403           | --         | hypothetical 17.4 kDa protein in puhA 5'region                                               | 36            | 44        | --        |
| orf KT71_19408           | --         | hypothetical 30.4 kDa protein in puhA 5'region                                               | 42            | 41        | --        |
| HemN                     | 1.3.99.22  | oxygen-independent coproporphyrinogen III oxidase                                            | 37            | 35        | --        |
| ldi                      | 5.3.3.2    | isopentenyl-diphosphate delta-isomerase                                                      | 48            | 54        | --        |

|                |           |                                                                                                            |    |    |    |
|----------------|-----------|------------------------------------------------------------------------------------------------------------|----|----|----|
| PufA           | --        | Light-harvesting protein B-880, alpha chain                                                                | 64 | 40 | -- |
| PufB           | --        | Light-harvesting protein B-880, beta chain                                                                 | 40 | 56 | -- |
| PufC           | --        | photosynthetic reaction center cytochrome c subunit                                                        | 61 | 64 | -- |
| PufM           | --        | photosynthetic reaction center protein M chain                                                             | 68 | 66 | -- |
| PufL           | --        | photosynthetic reaction center protein L chain                                                             | 71 | 81 | -- |
| orf KT71_19443 | --        | conserved hypothetical protein                                                                             | 37 | 52 | -- |
| BchZ           | 1.18.-.-  | chlorophyllide reductase subunit Z                                                                         | 72 | 73 | -- |
| BchY           | 1.18.-.-  | chlorophyllide reductase subunit Y                                                                         | 66 | 68 | -- |
| BchX           | 1.18.-.-  | chlorophyllide reductase subunit X                                                                         | 69 | 72 | -- |
| bchC           | 1.-.-.-   | 2-Desacetyl-2-hydroxyethyl bacteriochlorophyllide a dehydrogenase, bacteriochlorophyll biosynthesis        | 47 | 55 | -- |
| CrtF           | 2.1.1.-   | hydroxyneurosporene methyltransferase, steroid biosynthesis                                                | 43 | 45 | -- |
| CrtE           | 2.5.1.29  | geranylgeranyl pyrophosphate synthetase, steroid biosynthesis                                              | 57 | 51 | -- |
| CrtC           | 1.-.-.-   | hydroxyneurosporene dehydrogenase, steroid biosynthesis                                                    | -- | 43 | -- |
| CrtB           | 2.5.1.-   | phytoene synthase, steroid biosynthesis                                                                    | -- | 42 | -- |
| CrtI           | 1.14.99.- | phytoene dehydrogenase, steroid biosynthesis                                                               | -- | 62 | -- |
| BchO           | 6.6.1.1   | magnesium-protoporphyrin IX chelatase, O subunit, bacteriochlorophyll biosynthesis                         | -- | -- | -- |
| bchD           | 6.6.1.1   | magnesium-protoporphyrin IX chelatase, D subunit, bacteriochlorophyll biosynthesis                         | -- | -- | -- |
| bchI           | 6.6.1.1   | magnesium-protoporphyrin IX chelatase, I subunit, bacteriochlorophyll biosynthesis                         | -- | -- | -- |
| orf KT71_19508 | --        | Conserved hypothetical protein                                                                             | -- | -- | -- |
| bchE           | 1.14.13.- | magnesium-protoporphyrin IX monomethyl ester anaerobic oxidative cyclase, bacteriochlorophyll biosynthesis | -- | -- | -- |
| bchJ           | --        | 4-vinyl reductase, bacteriochlorophyll biosynthesis                                                        | -- | -- | -- |
| orf KT71_19523 | --        | Rhodanese-domain protein                                                                                   | -- | -- | -- |

---

**Average identity**

**55**

**56**

**62**
