# Supplementary material
Source: PubMed Central journal article supplement (PMC1815277)
Supplement: pnas_0608046104_8.pdf [file pnas_0608046104_8.pdf]

**Table 2. Summary of all potential sensors found in KT71**

| #  | ORF              | Contig | Gene name | Annotation                                                          |
|----|------------------|--------|-----------|---------------------------------------------------------------------|
| 1  | KT71_00145       | 1      |           | two-component response regulator                                    |
|    | KT71_00150       | 1      |           | sensory box/GGDEF family protein                                    |
| 2  | KT71_00175       | 1      |           | two-component system sensor histidine kinase                        |
|    | KT71_00180       | 1      |           | two-component system response regulator                             |
| 3  | KT71_00675       | 1      |           | transcriptional regulatory protein                                  |
|    | KT71_00680       | 1      |           | sensor protein                                                      |
| 4  | KT71_03582       | 1      | oxyR      | Bacterial regulatory protein, LysR-type hydrogen peroxide inducible |
| 5  | KT71_04270       | 1      |           | two-component system sensor histidine kinase                        |
|    | KT71_04275       | 1      |           | two-component system response regulator                             |
| 6  | KT71_04735       | 1      | oxyR      | Bacterial regulatory protein, LysR-type hydrogen peroxide inducible |
| 7  | KT71_05972       | 1      |           | two-component system response regulator                             |
|    | KT71_05977       | 1      |           | two-component system sensor protein                                 |
| 8  | KT71_05987       | 1      |           | two-component system sensor histidine kinase                        |
|    | KT71_05992       | 1      |           | two-component system response regulator                             |
| 9  | KT71_06409       | 1      |           | two-component system sensor histidine kinase                        |
|    | KT71_06419       | 1      |           | two-component system response regulator                             |
| 10 | KT71_06529       | 1      |           | Fe <sup>2+</sup> -dicitrate sensor, membrane component              |
|    | KT71_06539       | 1      |           | transcriptional regulator (AraC family)                             |
| 11 | KT71_06949       | 1      |           | sensory box/GGDEF family protein                                    |
| 12 | KT71_07079       | 1      |           | two-component system, sensor protein                                |
|    | KT71_07084       | 1      |           | two-component system response regulator                             |
| 13 | KT71_07694       | 1      |           | two-component hybrid sensor and regulator                           |
| 14 | KT71_08064       | 1      |           | two-component system response regulator                             |
|    | KT71_08069       | 1      |           | two-component system sensor histidine kinase                        |
| 15 | KT71_08847       | 1      |           | two-component system sensor histidine kinase                        |
|    | KT71_08852       | 1      |           | two-component system response regulator                             |
| 16 | KT71_09237       | 1      |           | two-component system response regulator                             |
|    | KT71_09242       | 1      |           | two-component system sensor histidine kinase                        |
| 17 | KT71_09297       | 1      |           | sensory box/GGDEF family protein                                    |
| 18 | KT71_09447       | 1      |           | BLUF (Sensor of blue-light using FAD) domain protein                |
|    | KT71_09452       | 1      |           | two-component system response regulator                             |
| 19 | KT71_09457       | 1      |           | two-component system response regulator                             |
|    | KT71_09462       | 1      |           | two-component system sensor histidine kinase                        |
| 20 | KT71_09467       | 1      |           | sensory box/GGDEF family protein                                    |
| 21 | KT71_09742       | 1      |           | two-component system response regulator                             |
|    | KT71_09747       | 1      |           | two-component system sensor histidine kinase                        |
| 22 | KT71_12990       | 2      |           | two-component system sensor histidine kinase                        |
|    | KT71_12995       | 2      |           | two component system response regulator                             |
| 23 | KT71_14029       | 2      |           | sensory box PAS/GGDEF/EAL domain protein                            |
| 24 | KT71_14254       | 2      |           | sensory box/GGDEF family protein                                    |
| 25 | KT71_14414       | 2      |           | sensory box GGDEF/EAL domain protein                                |
| 26 | KT71_16521       | 2      | phoR      | Phosphate regulon sensor protein phoR                               |
|    | KT71_16526       | 2      | phoB      | Phosphate regulon transcriptional regulatory protein phoB           |
| 27 | KT71_16971       | 2      |           | sensory box GGDEF/EAL domain protein                                |
|    | KT71_16991-17006 | 2      | fixNOQP   | cbb3-type cytochrome c oxidase, oxygen sensor                       |

|    |            |   |      |                                                      |
|----|------------|---|------|------------------------------------------------------|
| 28 | KT71_17306 | 2 |      | two-component response regulator                     |
|    | KT71_17311 | 2 |      | two-component system sensor histidine kinase         |
| 29 | KT71_17611 | 2 |      | two-component response regulator                     |
|    | KT71_17616 | 2 |      | two-component sensor histidine kinase                |
| 30 | KT71_17761 | 2 |      | heavy metal sensor kinase                            |
|    | KT71_17766 | 2 |      | heavy metal response regulator                       |
| 31 | KT71_18132 | 2 |      | two-component response regulator                     |
|    | KT71_18137 | 2 |      | two-component system sensor histidine kinase         |
| 32 | KT71_18361 | 2 |      | sensory box EAL/GGDEF family protein                 |
| 33 | KT71_18366 | 2 |      | sensory box EAL/GGDEF family protein                 |
| 34 | KT71_18916 | 2 |      | sensory box/GGDEF/EAL family protein                 |
| 35 | KT71_19323 | 2 |      | BLUF (Sensor of blue-light using FAD) domain protein |
| 36 | KT71_19657 | 2 | pilS | sensor protein PilS                                  |
|    | KT71_19662 | 2 | pilR | type 4 fimbriae expression regulatory protein        |

Grey shading indicate neighboring genes and coding for composite sensors, e.g., two-component systems.

### TonB-dependent receptor systems

| #  | ORF        | Contig | Gene name | Annotation                                           |
|----|------------|--------|-----------|------------------------------------------------------|
| 1  | KT71_02412 | 1      |           | TonB-dependent receptor                              |
| 2  | KT71_03955 | 1      |           | TonB-dependent receptor                              |
| 3  | KT71_05287 | 1      |           | TonB-dependent receptor                              |
| 4  | KT71_05507 | 1      |           | TonB-dependent receptor                              |
| 5  | KT71_06242 | 1      |           | TonB-dependent receptor                              |
| 6  | KT71_06524 | 1      |           | TonB-dependent receptor                              |
| 7  | KT71_07399 | 1      |           | TonB-dependent receptor                              |
| 8  | KT71_07529 | 1      |           | TonB-dependent receptor                              |
| 9  | KT71_07714 | 1      |           | TonB-dependent receptor                              |
| 10 | KT71_07799 | 1      |           | TonB-dependent receptor                              |
| 11 | KT71_07804 | 1      |           | TonB-dependent receptor                              |
| 12 | KT71_08400 | 1      |           | TonB-dependent receptor                              |
| 13 | KT71_11054 | 1      |           | TonB-dependent receptor                              |
| 14 | KT71_12215 | 1      |           | TonB-dependent receptor                              |
| 15 | KT71_12345 | 1      |           | TonB-dependent receptor                              |
| 16 | KT71_12945 | 1      |           | TonB-dependent receptor                              |
| 17 | KT71_13110 | 2      |           | TonB-dependent receptor                              |
| 18 | KT71_13614 | 2      |           | TonB-dependent receptor                              |
| 19 | KT71_14239 | 2      |           | TonB-dependent receptor                              |
| 20 | KT71_14434 | 2      |           | TonB-dependent receptor                              |
| 21 | KT71_15264 | 2      |           | TonB-dependent receptor                              |
| 22 | KT71_16836 | 2      |           | TonB-dependent receptor                              |
| 23 | KT71_17391 | 2      | btuB      | TonB-dependent receptor Vitamin B12 transporter btuB |
| 24 | KT71_17421 | 2      |           | TonB-dependent receptor                              |
| 25 | KT71_18501 | 2      |           | TonB-dependent receptor                              |
| 26 | KT71_18621 | 2      | btuB      | TonB-dependent receptor Vitamin B12 transporter btuB |
| 27 | KT71_18921 | 2      |           | TonB-dependent receptor                              |
