# Supplementary material
Source: PubMed Central journal article supplement (PMC1815277)
Supplement: pnas_0608046104_9.pdf [file pnas_0608046104_9.pdf]

**Table 3. Synthetic seawater medium (MPM)**

|                                        | Grams per liter of Milli Q water |
|----------------------------------------|----------------------------------|
| NaCl                                   | 30.0                             |
| MgCl <sub>2</sub> · 6 H <sub>2</sub> O | 1.0                              |
| Na <sub>2</sub> SO <sub>4</sub>        | 4.0                              |
| KCl                                    | 0.7                              |
| CaCl <sub>2</sub> · 2 H <sub>2</sub> O | 0.15                             |
| NH <sub>4</sub> Cl                     | 0.5                              |
| NaHCO <sub>3</sub>                     | 0.2                              |
| KBr                                    | 0.1                              |
| SrCl <sub>2</sub> · 6 H <sub>2</sub> O | 0.04                             |
| H <sub>3</sub> BO <sub>3</sub>         | 0.025                            |
| KF                                     | 0.001                            |
| Morpholinepropanesulfonic acid (MOPS)  | 2.09                             |
| KH <sub>2</sub> PO <sub>4</sub>        | 0.27                             |

pH 7. After ref. 1.

1. Schut F, De Vries EJ, Gottschal JC, Robertson BR, Harder W, Prins RA, Button DK (1993) *Appl Environ Microbiol* 59:2150-2160.
