# Supplementary material
Source: PubMed Central journal article supplement (PMC1815277)
Supplement: pnas_0608046104_10.pdf [file pnas_0608046104_10.pdf]

**Table 4. Modifications (MPM-m)**

|                                 |         |
|---------------------------------|---------|
| NH <sub>4</sub> Cl              | 0.0227  |
| KH <sub>2</sub> PO <sub>4</sub> | 0.00021 |

pH 7.5. After ref. 1. Per liter of medium addition of: 1 ml of vitamin solution, 1 ml of trace elements.

1. Eilers H, Pernthaler J, Peplies J, Glöckner FO, Gerds G, Amann R (2001) *Appl Environ Microbiol* 67:5134-5142.
