# Supplementary material
Source: PubMed Central journal article supplement (PMC1815277)
Supplement: pnas_0608046104_11.pdf [file pnas_0608046104_11.pdf]

**Table 5. Vitamin solution**

|                                            | Milligrams per liter of<br>Milli Q water |
|--------------------------------------------|------------------------------------------|
| p-aminobenzoic acid (Vit. H <sub>1</sub> ) | 100                                      |
| Folic acid                                 | 50                                       |
| Thioctic acid                              | 50                                       |
| Riboflavin (Vit. B <sub>2</sub> )          | 100                                      |
| Thiamine (Vit. B <sub>1</sub> )            | 200                                      |
| Nicotinic acid amid                        | 200                                      |
| Pyridoxamine (Vit. B <sub>6</sub> )        | 500                                      |
| Panthenic acid                             | 100                                      |
| Cobalamin (Vit. B <sub>12</sub> )          | 100                                      |
| Biotin                                     | 20                                       |

After ref. 1.

1. Heijthuijsen J, Hansen TA (1986) *FEMS Microbiol Ecol* 38:57-64.*et al.*
