# Supplementary material
Source: PubMed Central journal article supplement (PMC1815277)
Supplement: pnas_0608046104_12.pdf [file pnas_0608046104_12.pdf]

**Table 6. Trace elements**

|                                                       | Milligrams per liter of Milli Q water |
|-------------------------------------------------------|---------------------------------------|
| Na <sub>2</sub> EDTA                                  | 1,000                                 |
| FeCl <sub>3</sub> · 6 H <sub>2</sub> O                | 2,000                                 |
| LiCl                                                  | 1,000                                 |
| AlCl <sub>3</sub>                                     | 50                                    |
| NaVO <sub>3</sub> · 14 H <sub>2</sub> O               | 5                                     |
| K <sub>2</sub> Cr <sub>2</sub> O <sub>7</sub>         | 0.15                                  |
| MnCl <sub>2</sub> · 4 H <sub>2</sub> O                | 80                                    |
| CoCl <sub>2</sub> · 6 H <sub>2</sub> O                | 5                                     |
| NiCl <sub>2</sub> · 6 H <sub>2</sub> O                | 20                                    |
| CuCl <sub>2</sub>                                     | 20                                    |
| ZnCl <sub>2</sub>                                     | 60                                    |
| Na <sub>2</sub> SeO <sub>3</sub> · 5 H <sub>2</sub> O | 15                                    |
| RbCl                                                  | 150                                   |
| Na <sub>2</sub> MoO <sub>4</sub> · 2 H <sub>2</sub> O | 75                                    |
| SnCl <sub>2</sub> · 2 H <sub>2</sub> O                | 1.5                                   |
| KI                                                    | 80                                    |
| BaCl <sub>2</sub> · 2 H <sub>2</sub> O                | 50                                    |
| Na <sub>2</sub> WO <sub>4</sub> · 2 H <sub>2</sub> O  | 15                                    |

After ref. 1.

1. Schut F, De Vries EJ, Gottschal JC, Robertson BR, Harder W, Prins RA, Button DK (1993) *Appl Environ Microbiol* 59:2150-2160.
