# Supplementary material
Source: PubMed Central journal article supplement (PMC1815277)

scaffold 2

scaffold 1

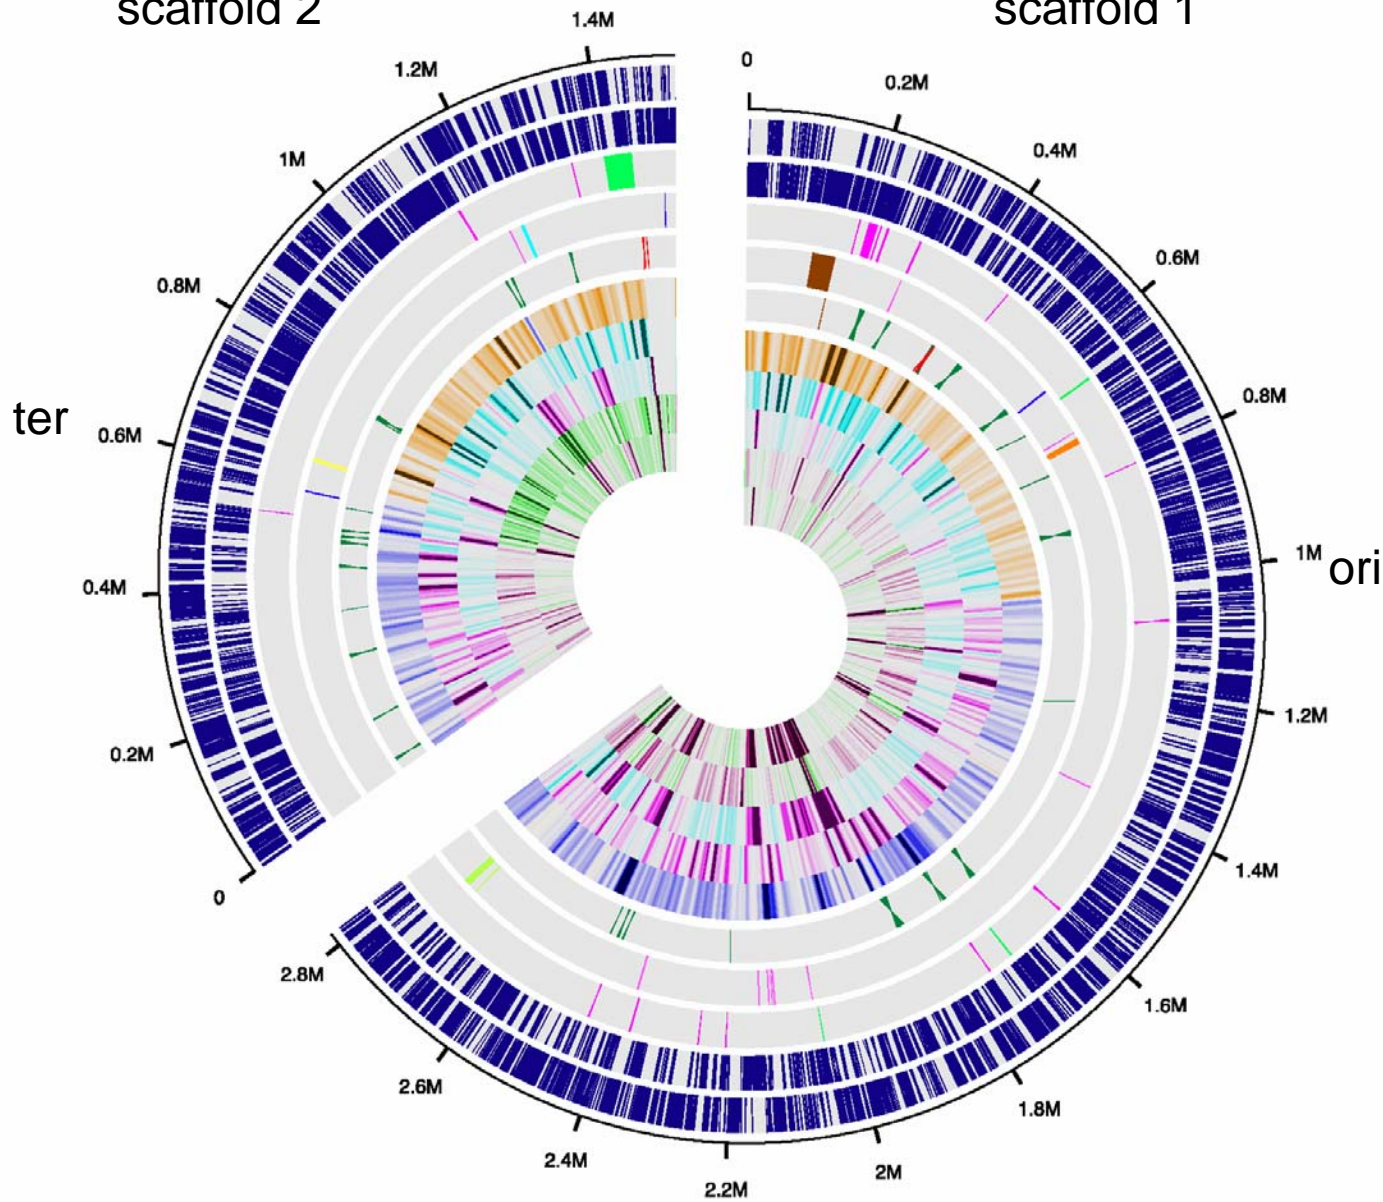

Supplement: pnas_0608046104_1.pdf [file pnas_0608046104_1.pdf]

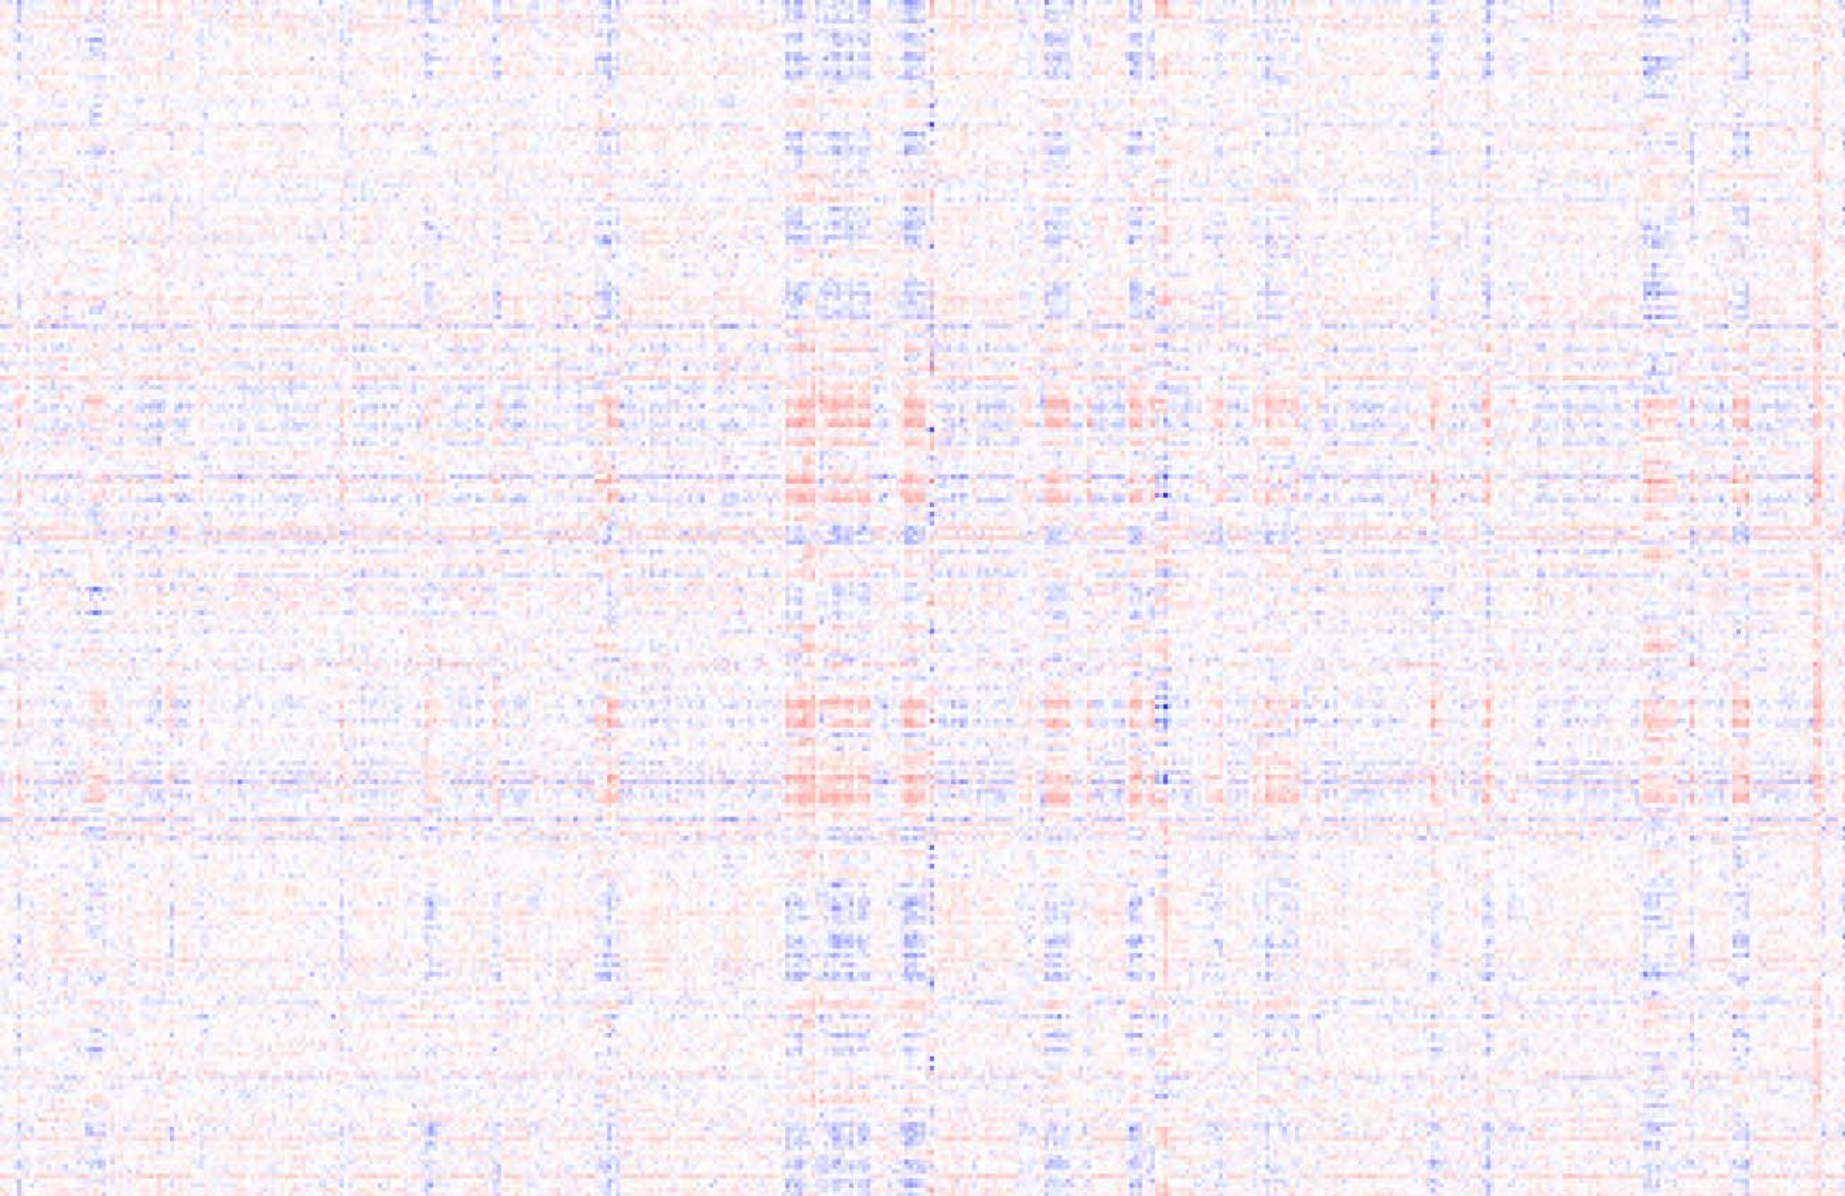

1 Mb

2 Mb

3 Mb

4 Mb

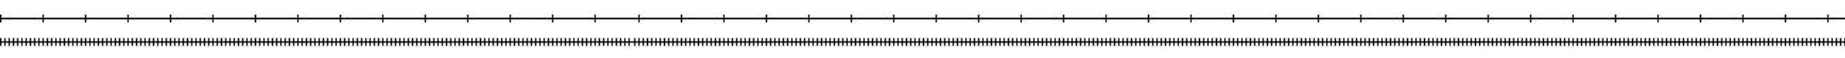

Supplement: pnas_0608046104_2.pdf [file pnas_0608046104_2.pdf]

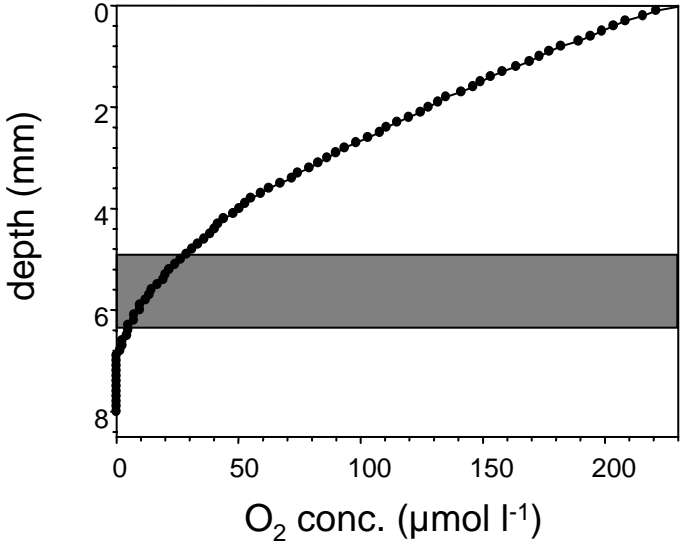

Supplement: pnas_0608046104_3.pdf [file pnas_0608046104_3.pdf]

A

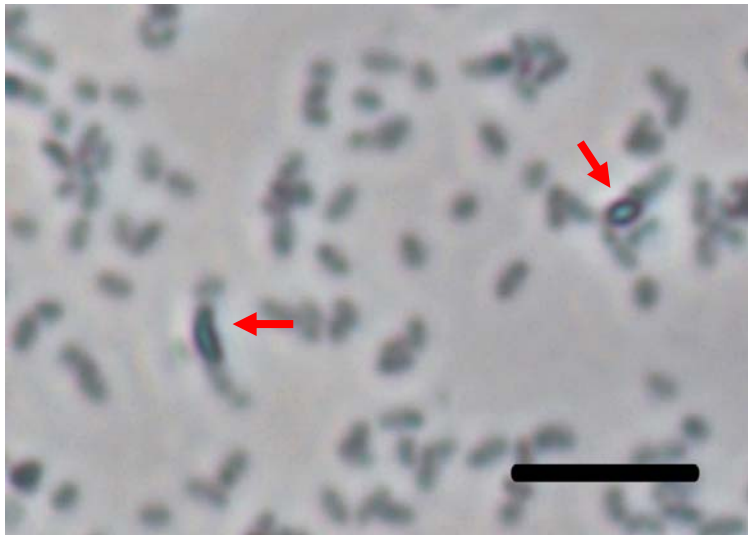

B

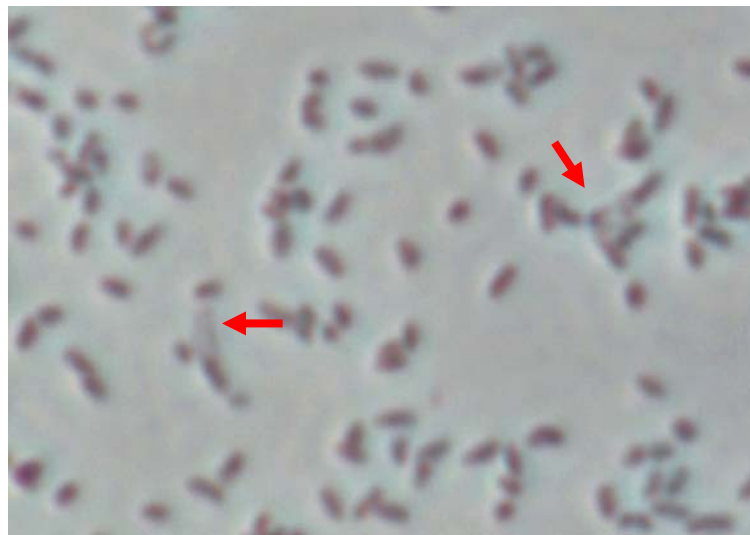

Supplement: pnas_0608046104_4.pdf [file pnas_0608046104_4.pdf]

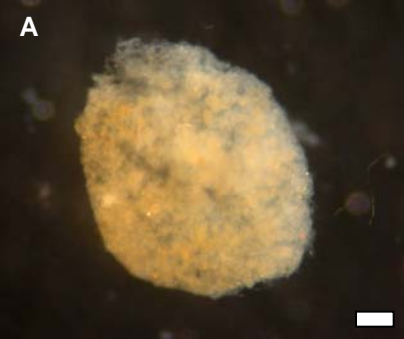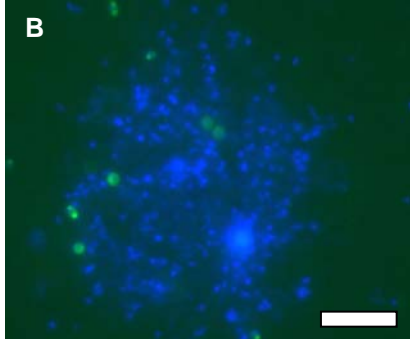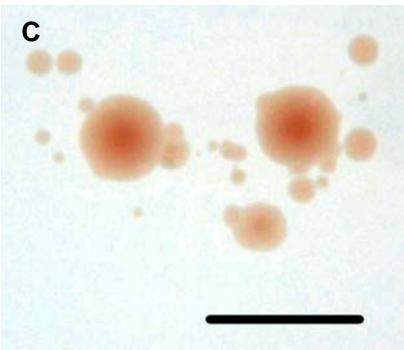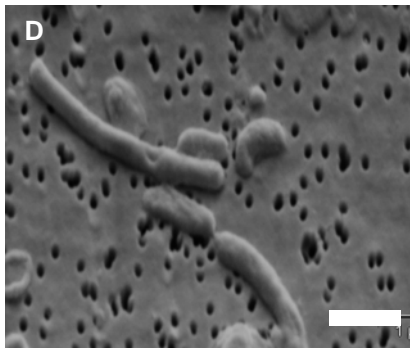

Supplement: pnas_0608046104_5.pdf [file pnas_0608046104_5.pdf]

Cumulative GC skew within the two major contigs of the KT71 genome

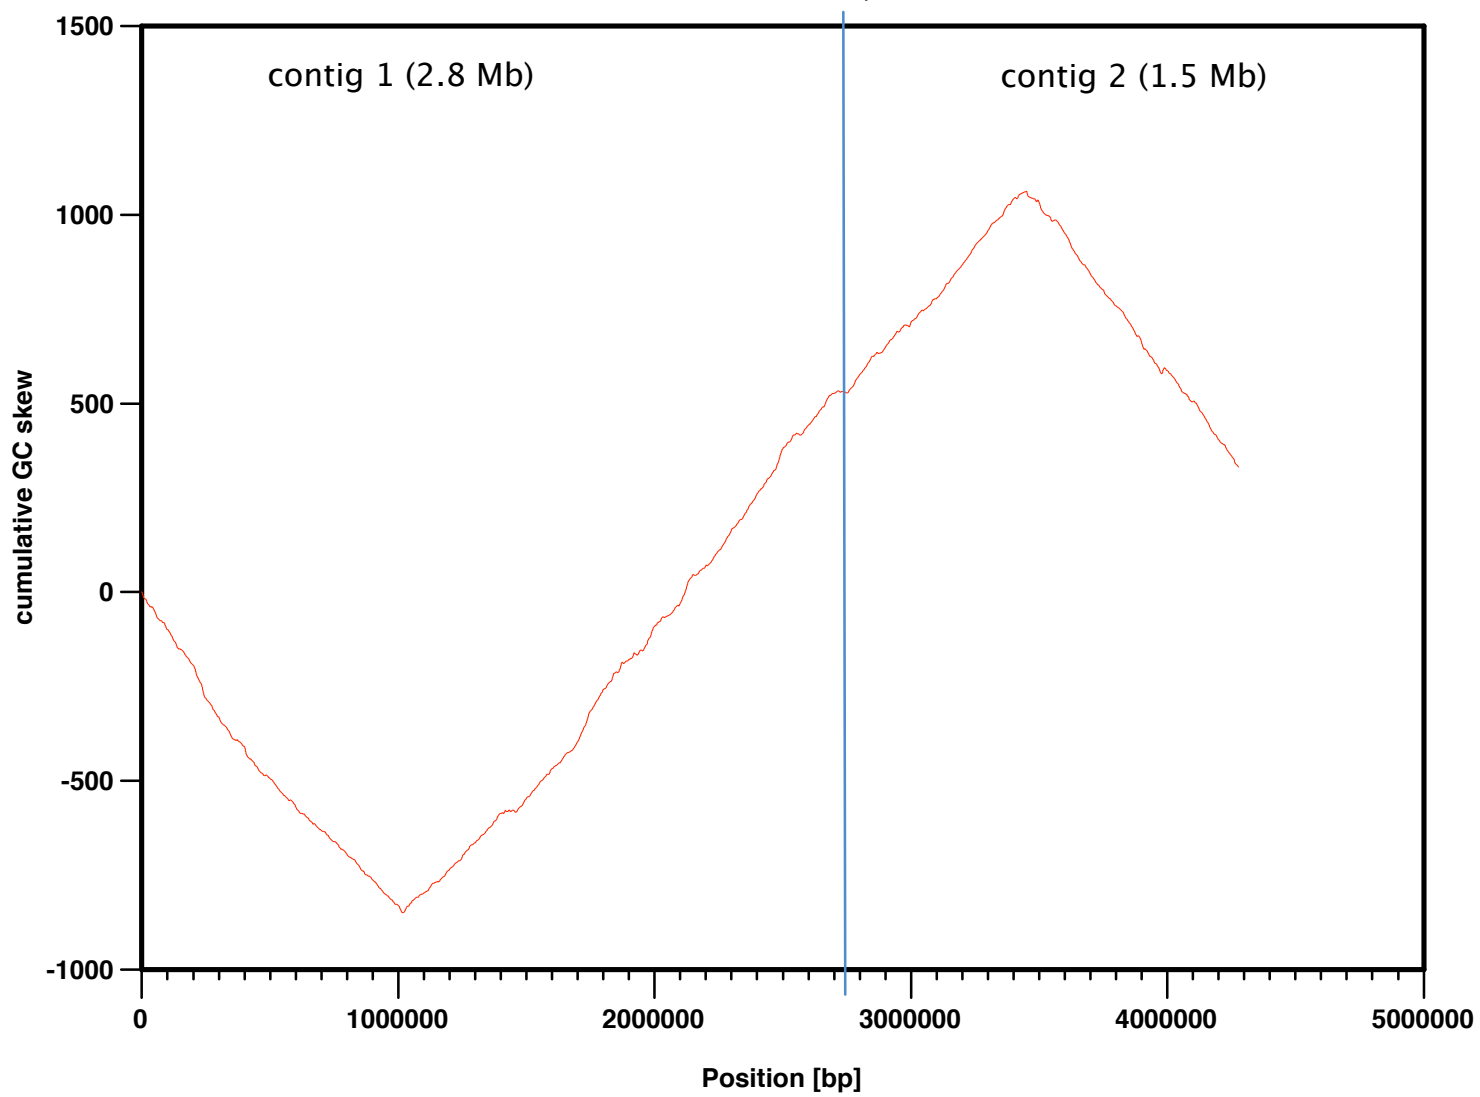

Supplement: pnas_0608046104_6.pdf [file pnas_0608046104_6.pdf]
